# Supplementary material for: Examining the effectiveness of the Gateway conditional caution on health and well-being of young adults committing low-level offences: a randomised controlled trial
Source: PubMed Central journal article supplement (PMC11057255; doi:10.1136/bmjopen-2023-081179), 2024-04-25
Supplement: bmjopen-2023-081179supp001.pdf [file bmjopen-2023-081179supp001.pdf]

## Appendix A: Delivery of Gateway and usual process

**Table 1:** Conditions attached to cautions, presented by whether the participant received a Gateway conditional caution or a caution forming part of usual process (either a simple caution or a different conditional caution).

|                                                                  | <b>Gateway conditional caution<br/>(n=105)</b> | <b>Usual process<br/>(n=80)</b> |
|------------------------------------------------------------------|------------------------------------------------|---------------------------------|
| <b>Conditions attached (multiple conditions possible), n (%)</b> |                                                |                                 |
| Standard Gateway conditions (no additional conditions added)     | 85 (81.0)                                      | NA                              |
| None (simple caution)                                            | NA                                             | 5 (6.3)                         |
| Compensation                                                     | 18 (17.1)                                      | 20 (25.0)                       |
| Letter of apology                                                | 5 (4.8)                                        | 10 (12.5)                       |
| Victim awareness course                                          | 0 (0)                                          | 14 (17.5)                       |
| Alcohol diversion course                                         | 0 (0)                                          | 11 (13.8)                       |
| Drugs diversion course                                           | 0 (0)                                          | 16 (20.0)                       |
| Not to enter specific premises                                   | 0 (0)                                          | 1 (1.3)                         |
| Fine                                                             | 0 (0)                                          | 5 (6.3)                         |
| Women and Desistance Empowerment programme                       | 0 (0)                                          | 9 (11.3)                        |
| Restorative justice                                              | 0 (0)                                          | 0 (0)                           |

**Table 2:** Information on delivery of the Gateway intervention.

|                                                                            | <b>Received Gateway conditional caution (n=105)</b> |
|----------------------------------------------------------------------------|-----------------------------------------------------|
| <b>LINX workshops attended (supplemented with change of status data)</b>   |                                                     |
| <b>Number with data, n (%)</b>                                             | <b>101 (96.2)</b>                                   |
| 0 (Did not attend LINX sessions due to COVID-19 pause)                     | 4 (4.0)                                             |
| 0 (participant chose to not attend LINX sessions)                          | 8 (7.9)                                             |
| 1 (participant chose not to attend LINX session)                           | 1 (1.0)                                             |
| 2                                                                          | 88 (87.1)                                           |
| <b>Delivery of LINX workshops</b>                                          |                                                     |
| <b>Number with data, n (% of those who attended at least one workshop)</b> | <b>80 (89.9%)</b>                                   |

|                                                                         |                  |
|-------------------------------------------------------------------------|------------------|
| Face-to-face                                                            | 45 (56.3)        |
| Telephone                                                               | 35 (43.8)        |
| <b>Contacts attempted by navigator (excluding LINX workshops)</b>       |                  |
| <b>Number with data, n (%)</b>                                          | <b>76 (72.4)</b> |
| Mean (SD)                                                               | 52.8 (25.0)      |
| Median (IQR)                                                            | 42 (39, 63)      |
| Min, Max                                                                | 22, 168          |
| <b>Successful contacts made by navigator (excluding LINX workshops)</b> |                  |
| <b>Number with data, n (%)</b>                                          | <b>76 (72.4)</b> |
| Mean (SD)                                                               | 26.0 (20.7)      |
| Median (IQR)                                                            | 19 (15, 31)      |
| Min, Max                                                                | 0, 108           |
| <b>Total duration of successful contacts, minutes</b>                   |                  |
| <b>Number with data, n (%)</b>                                          | <b>70 (66.7)</b> |
| Mean (SD)                                                               | 761.5 (594.6)    |
| Median (IQR)                                                            | 626.5 (380, 978) |
| Min, Max                                                                | 36, 2785         |

## Appendix B: Participants informed of their disposal decision after their 4-week follow-up was due

**Table 3:** Information on time between randomisation and disposal decision and whether the 4-week follow-up was attended, for those informed of their disposal decision after the 4-week follow-up was due.

|                                                      | <b>Gateway conditional caution (n=12)</b> | <b>Usual process (n=3)</b> | <b>Total (n=15)</b> |
|------------------------------------------------------|-------------------------------------------|----------------------------|---------------------|
| <b>Time between randomisation and disposal, days</b> |                                           |                            |                     |
| <b>Number with data (%)</b>                          | <b>12 (100)</b>                           | <b>3 (100)</b>             | <b>15 (100)</b>     |
| Mean (SD)                                            | 49.6 (18.1)                               | NA                         | NA                  |
| Median (IQR)                                         | 42 (34.5, 67.5)                           | NA                         | NA                  |
| Min, Max                                             | 29, 77                                    | NA                         | NA                  |
| <b>Attended 4-week follow-up, n (%)</b>              |                                           |                            |                     |
| <b>Number with data (%)</b>                          | <b>12 (100)</b>                           | <b>3 (100)</b>             | <b>15 (100)</b>     |

|     |          |    |    |
|-----|----------|----|----|
| Yes | 8 (66.7) | NA | NA |
| No  | 4 (33.3) | NA | NA |

## Appendix C: Index of Multiple Drug Use

**Table 4:** Index of Multiple Drug Use presented at 4-weeks, 16-weeks and 1-year post randomisation.

|                                | <b>Gateway conditional caution<br/>(n=109)</b> | <b>Usual process<br/>(n=82)</b> |
|--------------------------------|------------------------------------------------|---------------------------------|
| <b>Week 4</b>                  |                                                |                                 |
| <b>Number with data, n (%)</b> | <b>57 (52.3)</b>                               | <b>36 (43.9)</b>                |
| Mean (SD)                      | 23.3 (6.4)                                     | 21.3 (5.0)                      |
| Median (IQR)                   | 22 (18, 27)                                    | 21.5 (16.5, 25)                 |
| Min, Max                       | 15, 42                                         | 15, 31                          |
| <b>Week 16</b>                 |                                                |                                 |
| <b>Number with data, n (%)</b> | <b>54 (49.5)</b>                               | <b>39 (47.6)</b>                |
| Mean (SD)                      | 23.3 (7.5)                                     | 22.3 (5.9)                      |
| Median (IQR)                   | 21 (17, 27)                                    | 22 (16, 25)                     |
| Min, Max                       | 15, 47                                         | 15, 38                          |
| <b>Year 1</b>                  |                                                |                                 |
| <b>Number with data, n (%)</b> | <b>27 (24.8)</b>                               | <b>16 (19.5)</b>                |
| Mean (SD)                      | 25.2 (7.7)                                     | 25.8 (6.3)                      |
| Median (IQR)                   | 23 (18, 31)                                    | 25.5 (21, 28.5)                 |
| Min, Max                       | 16, 41                                         | 16, 38                          |

## Appendix D: Adverse childhood experiences

**Table 5:** Adverse childhood experiences reported at 16 weeks post-randomisation.

|                                                | <b>Gateway conditional caution<br/>(n=109)</b> | <b>Usual process<br/>(n=82)</b> |
|------------------------------------------------|------------------------------------------------|---------------------------------|
| <b>Number of adverse childhood experiences</b> |                                                |                                 |
| <b>Number with data (%)</b>                    | <b>54 (49.5)</b>                               | <b>39 (47.6)</b>                |
| Mean (SD)                                      | 3.0 (2.6)                                      | 3.6 (3.0)                       |
| Median (IQR)                                   | 2 (1, 5)                                       | 4 (1, 5)                        |
| Min, Max                                       | 0, 10                                          | 0, 11                           |

## Appendix E: Health economic analysis

**Table 6:** Health economic data at 4-weeks, 16-weeks and 1-year post-randomisation, presented by group.

|  | <b>4-weeks post-randomisation</b> | <b>16-weeks post-randomisation</b> | <b>1-year post-randomisation</b> |
|--|-----------------------------------|------------------------------------|----------------------------------|
|  |                                   |                                    |                                  |

|                                                                                            | <b>Gateway<br/>conditional caution<br/>(n=109)</b> | <b>Usual<br/>process<br/>(n=82)</b> | <b>Gateway<br/>conditional caution<br/>(n=109)</b> | <b>Usual<br/>process<br/>(n=82)</b> | <b>Gateway<br/>conditional caution<br/>(n=109)</b> | <b>Usual<br/>process<br/>(n=82)</b> |
|--------------------------------------------------------------------------------------------|----------------------------------------------------|-------------------------------------|----------------------------------------------------|-------------------------------------|----------------------------------------------------|-------------------------------------|
| <b>Employed in<br/>previous month</b>                                                      |                                                    |                                     |                                                    |                                     |                                                    |                                     |
| <b>Number with data,<br/>n (%)</b>                                                         | <b>57 (52.3)</b>                                   | <b>36 (43.9)</b>                    | <b>54 (49.5)</b>                                   | <b>39 (47.6)</b>                    | <b>27 (24.8)</b>                                   | <b>16 (19.5)</b>                    |
| Yes                                                                                        | 31 (54.4)                                          | 16 (44.4)                           | 31 (57.4)                                          | 19 (48.7)                           | 16 (59.3)                                          | 11 (68.8)                           |
| No                                                                                         | 26 (45.6)                                          | 20 (55.6)                           | 23 (42.6)                                          | 20 (51.3)                           | 11 (40.7)                                          | 5 (31.3)                            |
| <b>Number of times<br/>visited GP in<br/>previous month</b>                                |                                                    |                                     |                                                    |                                     |                                                    |                                     |
| <b>Number with data,<br/>n (%)</b>                                                         | <b>57 (52.3)</b>                                   | <b>36 (43.9)</b>                    | <b>53 (48.6)</b>                                   | <b>39 (47.6)</b>                    | <b>27 (24.8)</b>                                   | <b>15 (18.3)</b>                    |
| Mean (SD)                                                                                  | 0.4 (0.7)                                          | 0.5 (1.0)                           | 0.4 (1.0)                                          | 0.5 (0.9)                           | 0.5 (1.0)                                          | 1.3 (2.6)                           |
| Median (IQR)                                                                               | 0 (0, 1)                                           | 0 (0, 0.5)                          | 0 (0, 0)                                           | 0 (0, 0)                            | 0 (0, 1)                                           | 1 (0, 1)                            |
| Min, Max                                                                                   | 0, 3                                               | 0, 4                                | 0, 5                                               | 0, 3                                | 0, 4                                               | 0, 10                               |
| <b>Number of times<br/>used drug/alcohol<br/>services in<br/>previous month</b>            |                                                    |                                     |                                                    |                                     |                                                    |                                     |
| <b>Number with data,<br/>n (%)</b>                                                         | <b>56 (51.4)</b>                                   | <b>36 (43.9)</b>                    | <b>53 (48.6)</b>                                   | <b>39 (47.6)</b>                    | <b>26 (23.9)</b>                                   | <b>15 (18.3)</b>                    |
| Mean (SD)                                                                                  | 0.3 (0.9)                                          | 0.3 (1.7)                           | 0.4 (1.2)                                          | 0.1 (0.4)                           | 0.2 (0.8)                                          | 0.4 (1.1)                           |
| Median (IQR)                                                                               | 0 (0, 0)                                           | 0 (0, 0)                            | 0 (0, 0)                                           | 0 (0, 0)                            | 0 (0, 0)                                           | 0 (0, 0)                            |
| Min, Max                                                                                   | 0, 4                                               | 0, 10                               | 0, 5                                               | 0, 2                                | 0, 4                                               | 0, 4                                |
| <b>Number of times<br/>visited accident<br/>and emergency in<br/>previous month</b>        |                                                    |                                     |                                                    |                                     |                                                    |                                     |
| <b>Number with data,<br/>n (%)</b>                                                         | <b>57 (52.3)</b>                                   | <b>36 (43.9)</b>                    | <b>54 (49.5)</b>                                   | <b>39 (47.6)</b>                    | <b>27 (24.8)</b>                                   | <b>15 (18.3)</b>                    |
| Mean (SD)                                                                                  | 0.2 (0.9)                                          | 0.1 (0.2)                           | 0.1 (0.3)                                          | 0 (0.2)                             | 0.6 (1.9)                                          | 0.2 (0.6)                           |
| Median (IQR)                                                                               | 0 (0, 0)                                           | 0 (0, 0)                            | 0 (0, 0)                                           | 0 (0, 0)                            | 0 (0, 0)                                           | 0 (0, 0)                            |
| Min, Max                                                                                   | 0, 6                                               | 0, 1                                | 0, 2                                               | 0, 1                                | 0, 10                                              | 0, 2                                |
| <b>Number of times<br/>admitted to<br/>hospital as<br/>inpatient in<br/>previous month</b> |                                                    |                                     |                                                    |                                     |                                                    |                                     |
| <b>Number with data,<br/>n (%)</b>                                                         | <b>57 (52.3)</b>                                   | <b>36 (43.9)</b>                    | <b>53 (48.6)</b>                                   | <b>39 (47.6)</b>                    | <b>27 (24.8)</b>                                   | <b>15 (18.3)</b>                    |
| Mean (SD)                                                                                  | 0.1 (0.3)                                          | 0 (0)                               | 0.1 (0.3)                                          | 0 (0)                               | 0.3 (1.0)                                          | 0 (0)                               |
| Median (IQR)                                                                               | 0 (0, 0)                                           | 0 (0, 0)                            | 0 (0, 0)                                           | 0 (0, 0)                            | 0 (0, 0)                                           | 0 (0, 0)                            |
| Min, Max                                                                                   | 0, 2                                               | 0, 0                                | 0, 2                                               | 0, 0                                | 0, 4                                               | 0, 0                                |
| <b>Number of times<br/>used community<br/>mental health</b>                                |                                                    |                                     |                                                    |                                     |                                                    |                                     |

|                                                                                  |                  |                  |                  |                  |                  |                  |
|----------------------------------------------------------------------------------|------------------|------------------|------------------|------------------|------------------|------------------|
| <b>team in previous month</b>                                                    |                  |                  |                  |                  |                  |                  |
| <b>Number with data, n (%)</b>                                                   | <b>56 (51.4)</b> | <b>35 (2.7)</b>  | <b>53 (48.6)</b> | <b>38 (46.3)</b> | <b>26 (23.9)</b> | <b>15 (18.3)</b> |
| Mean (SD)                                                                        | 0.2 (0.8)        | 0.2 (0.7)        | 0.2 (0.6)        | 1.1 (4.9)        | 0.4 (1.1)        | 0.5 (1.2)        |
| Median (IQR)                                                                     | 0 (0, 0)         | 0 (0, 0)         | 0 (0, 0)         | 0 (0, 0)         | 0 (0, 0)         | 0 (0, 0)         |
| Min, Max                                                                         | 0, 4             | 0, 3             | 0, 3             | 0, 30            | 0, 4             | 0, 4             |
| <b>Number of times used psychiatric services as in-patient in previous month</b> |                  |                  |                  |                  |                  |                  |
| <b>Number with data, n (%)</b>                                                   | <b>57 (52.3)</b> | <b>36 (43.9)</b> | <b>53 (48.6)</b> | <b>39 (47.6)</b> | <b>27 (24.8)</b> | <b>15 (18.3)</b> |
| Mean (SD)                                                                        | 0 (0.2)          | 0 (0.2)          | 0 (0)            | 0.2 (1.0)        | 0 (0.2)          | 0.1 (0.3)        |
| Median (IQR)                                                                     | 0 (0, 0)         | 0 (0, 0)         | 0 (0, 0)         | 0 (0, 0)         | 0 (0, 0)         | 0 (0, 0)         |
| Min, Max                                                                         | 0, 1             | 0, 1             | 0, 0             | 0, 6             | 0, 1             | 0, 1             |
| <b>Used the following prescribed medications in previous month, n (%)</b>        |                  |                  |                  |                  |                  |                  |
| <b>Number with data, n (%)</b>                                                   | <b>57 (52.3)</b> | <b>36 (43.9)</b> | <b>54 (49.5)</b> | <b>39 (47.6)</b> | <b>27 (25.0)</b> | <b>16 (19.3)</b> |
| Amitriptyline                                                                    | 1 (1.8)          | 0 (0)            | 1 (1.9)          | 0 (0)            | 2 (7.4)          | 0 (0)            |
| Aripirazole                                                                      | 1 (1.8)          | 0 (0)            | 0 (0)            | 0 (0)            | 0 (0)            | 0 (0)            |
| Cerelle                                                                          | 0 (0)            | 0 (0)            | 0 (0)            | 0 (0)            | 1 (3.7)          | 0 (0)            |
| Citalopram                                                                       | 3 (5.3)          | 1 (2.8)          | 1 (1.9)          | 2 (5.1)          | 1 (3.7)          | 0 (0)            |
| Co-codamol                                                                       | 0 (0)            | 0 (0)            | 1 (1.9)          | 0 (0)            | 0 (0)            | 0 (0)            |
| Codeine                                                                          | 0 (0)            | 1 (2.8)          | 0 (0)            | 0 (0)            | 0 (0)            | 0 (0)            |
| Cyclizine                                                                        | 1 (1.8)          | 0 (0)            | 0 (0)            | 0 (0)            | 0 (0)            | 0 (0)            |
| Diazepam                                                                         | 0 (0)            | 0 (0)            | 0 (0)            | 1 (2.6)          | 0 (0)            | 0 (0)            |
| Doxycycline                                                                      | 0 (0)            | 0 (0)            | 0 (0)            | 1 (2.6)          | 0 (0)            | 0 (0)            |
| Inhaler                                                                          | 0 (0)            | 4 (11.1)         | 5 (9.3)          | 2 (5.1)          | 1 (3.7)          | 0 (0)            |
| Escitalopram                                                                     | 1 (1.8)          | 1 (2.8)          | 0 (0)            | 0 (0)            | 0 (0)            | 0 (0)            |
| Fluoxetine                                                                       | 3 (5.3)          | 1 (2.8)          | 0 (0)            | 2 (5.1)          | 0 (0)            | 0 (0)            |
| Quetiapine                                                                       | 2 (3.5)          | 1 (2.8)          | 0 (0)            | 0 (0)            | 0 (0)            | 1 (6.3)          |
| Lamotrigine                                                                      | 0 (0)            | 0 (0)            | 0 (0)            | 0 (0)            | 1 (3.7)          | 0 (0)            |
| Lymecycline                                                                      | 0 (0)            | 2 (5.6)          | 0 (0)            | 1 (2.6)          | 0 (0)            | 0 (0)            |
| Macrogol 3350                                                                    | 1 (1.8)          | 0 (0)            | 0 (0)            | 0 (0)            | 0 (0)            | 0 (0)            |
| Melatonin                                                                        | 0 (0)            | 0 (0)            | 0 (0)            | 1 (2.6)          | 0 (0)            | 0 (0)            |
| Methadone                                                                        | 0 (0)            | 0 (0)            | 1 (1.9)          | 0 (0)            | 0 (0)            | 0 (0)            |
| Mirtazapine                                                                      | 2 (3.5)          | 0 (0)            | 2 (3.7)          | 0 (0)            | 1 (3.7)          | 1 (6.3)          |
| Naproxen                                                                         | 1 (1.8)          | 0 (0)            | 2 (3.7)          | 0 (0)            | 0 (0)            | 0 (0)            |
| Omeprazole                                                                       | 1 (1.8)          | 0 (0)            | 0 (0)            | 0 (0)            | 0 (0)            | 0 (0)            |
| Ondansetron                                                                      | 0 (0)            | 0 (0)            | 1 (1.9)          | 0 (0)            | 0 (0)            | 0 (0)            |
| Olanzapine                                                                       | 0 (0)            | 1 (2.8)          | 0 (0)            | 0 (0)            | 0 (0)            | 0 (0)            |
| Phenergan                                                                        | 0 (0)            | 2 (5.6)          | 0 (0)            | 0 (0)            | 0 (0)            | 0 (0)            |

|                                                                         |           |          |          |          |          |          |
|-------------------------------------------------------------------------|-----------|----------|----------|----------|----------|----------|
| Prednisolone                                                            | 1 (1.8)   | 0 (0)    | 0 (0)    | 0 (0)    | 0 (0)    | 0 (0)    |
| Pregabalin                                                              | 0 (0)     | 1 (2.8)  | 1 (1.9)  | 0 (0)    | 0 (0)    | 0 (0)    |
| Prochlorperazine maleate                                                | 1 (1.8)   | 0 (0)    | 0 (0)    | 0 (0)    | 0 (0)    | 0 (0)    |
| Promethazine hydrochloride                                              | 0 (0)     | 0 (0)    | 0 (0)    | 1 (2.6)  | 0 (0)    | 0 (0)    |
| Propranolol hydrochloride                                               | 1 (1.8)   | 0 (0)    | 0 (0)    | 0 (0)    | 0 (0)    | 0 (0)    |
| Quetiapine                                                              | 2 (3.5)   | 0 (0)    | 4 (7.4)  | 3 (7.7)  | 2 (7.4)  | 0 (0)    |
| Ramipril                                                                | 0 (0)     | 0 (0)    | 1 (1.9)  | 0 (0)    | 0 (0)    | 0 (0)    |
| Risperidone                                                             | 0 (0)     | 1 (2.8)  | 0 (0)    | 0 (0)    | 0 (0)    | 0 (0)    |
| Salbutamol                                                              | 0 (0)     | 0 (0)    | 0 (0)    | 0 (0)    | 0 (0)    | 1 (6.3)  |
| Sertraline                                                              | 3 (5.3)   | 4 (11.1) | 7 (13.0) | 5 (12.8) | 2 (7.4)  | 2 (12.5) |
| Prochlorperazine                                                        | 0 (0)     | 0 (0)    | 1 (1.9)  | 0 (0)    | 0 (0)    | 0 (0)    |
| Tacrolimus                                                              | 1 (1.8)   | 0 (0)    | 0 (0)    | 0 (0)    | 0 (0)    | 0 (0)    |
| Venlafaxine                                                             | 1 (1.8)   | 0 (0)    | 0 (0)    | 1 (2.6)  | 1 (3.7)  | 0 (0)    |
| Vortioxetine                                                            | 0 (0)     | 1 (2.8)  | 0 (0)    | 0 (0)    | 0 (0)    | 0 (0)    |
| <b>Reason for using prescribed medications in previous month, n (%)</b> |           |          |          |          |          |          |
| <b>Number with data (% of those who reported using a medication)</b>    |           |          |          |          |          |          |
| Acne                                                                    | 0 (0)     | 3 (20.0) | 0 (0)    | 0 (0)    | 0 (0)    | 0 (0)    |
| Anterior cruciate ligament injury                                       | 0 (0)     | 1 (6.7)  | 0 (0)    | 0 (0)    | 0 (0)    | 0 (0)    |
| ADHD                                                                    | 1 (5.0)   | 1 (6.7)  | 1 (4.8)  | 0 (0)    | 0 (0)    | 0 (0)    |
| Anxiety                                                                 | 7 (35.0)  | 7 (46.7) | 4 (19.0) | 2 (14.3) | 2 (25.0) | 2 (28.6) |
| Asthma                                                                  | 1 (5.0)   | 4 (26.7) | 5 (23.8) | 2 (14.3) | 1 (12.5) | 1 (14.3) |
| Back pain                                                               | 0 (0)     | 0 (0)    | 1 (4.8)  | 0 (0)    | 0 (0)    | 0 (0)    |
| Blood pressure                                                          | 0 (0)     | 0 (0)    | 0 (0)    | 0 (0)    | 1 (12.5) | 0 (0)    |
| Depression                                                              | 11 (55.0) | 7 (46.7) | 8 (38.1) | 3 (21.4) | 5 (62.5) | 2 (28.6) |
| Ear infection                                                           | 0 (0)     | 0 (0)    | 0 (0)    | 0 (0)    | 0 (0)    | 1 (14.3) |
| Gastroparesis                                                           | 1 (5.0)   | 0 (0)    | 1 (4.8)  | 0 (0)    | 1 (12.5) | 0 (0)    |
| Heroin addiction                                                        | 0 (0)     | 0 (0)    | 1 (4.8)  | 0 (0)    | 0 (0)    | 0 (0)    |
| Hypertension                                                            | 0 (0)     | 0 (0)    | 1 (4.8)  | 0 (0)    | 0 (0)    | 0 (0)    |
| Immune                                                                  | 1 (5.0)   | 0 (0)    | 1 (4.8)  | 0 (0)    | 0 (0)    | 0 (0)    |

|                                                    |          |          |          |         |          |          |
|----------------------------------------------------|----------|----------|----------|---------|----------|----------|
| system<br>suppression<br>post-kidney<br>transplant |          |          |          |         |          |          |
| Inflammation                                       | 1 (5.0)  | 0 (0)    | 0 (0)    | 0 (0)   | 0 (0)    | 0 (0)    |
| Insomnia                                           | 2 (10.0) | 1 (6.7)  | 0 (0)    | 1 (7.1) | 1 (12.5) | 0 (0)    |
| Mood<br>stabilisation                              | 2 (10.0) | 1 (6.7)  | 3 (14.3) | 1 (7.1) | 1 (12.5) | 0 (0)    |
| Nail infection                                     | 0 (0)    | 0 (0)    | 0 (0)    | 0 (0)   | 0 (0)    | 1 (14.3) |
| Nausea                                             | 1 (5.0)  | 0 (0)    | 1 (4.8)  | 0 (0)   | 0 (0)    | 0 (0)    |
| Pain relief                                        | 0 (0)    | 0 (0)    | 2 (9.5)  | 0 (0)   | 1 (12.5) | 0 (0)    |
| Panic attacks                                      | 0 (0)    | 1 (6.7)  | 0 (0)    | 0 (0)   | 0 (0)    | 0 (0)    |
| Psychosis                                          | 2 (10.0) | 1 (6.7)  | 1 (4.8)  | 0 (0)   | 1 (12.5) | 1 (14.3) |
| PTSD                                               | 0 (0)    | 2 (13.3) | 0 (0)    | 0 (0)   | 0 (0)    | 0 (0)    |
